1 **Serum proteomics identifies immune pathways and candidate biomarkers of coronavirus**  
2 **infection in wild vampire bats**

3

4 Daniel J. Becker<sup>1\*</sup>, Guang-Sheng Lei<sup>2</sup>, Michael G. Janech<sup>3,4</sup>, Alison M. Brand<sup>3,4</sup>, M. Brock  
5 Fenton<sup>5</sup>, Nancy B. Simmons<sup>6</sup>, Ryan F. Relich<sup>2</sup>, Benjamin A. Neely<sup>7</sup>

6

7 <sup>1</sup> Department of Biology, University of Oklahoma, Norman, OK, USA

8 <sup>2</sup> Department of Pathology and Laboratory Medicine, Indiana University School of Medicine,  
9 Indianapolis, IN, USA

10 <sup>3</sup> Hollings Marine Laboratory, Charleston, SC, USA

11 <sup>4</sup> Department of Biology, College of Charleston, Charleston, SC, USA

12 <sup>5</sup> Department of Biology, Western University, London, Ontario Canada

13 <sup>6</sup> Department of Mammalogy, Division of Vertebrate Zoology, American Museum of Natural  
14 History, New York, NY, USA

15 <sup>7</sup> Chemical Sciences Division, National Institute of Standards and Technology, Charleston, SC,  
16 USA

17 \*Corresponding author

18

19 **Running head:** Proteomics of bat CoV infection

20 **Keywords:** proteome, *Alphacoronavirus*, *Desmodus rotundus*, ecoimmunology, biomarker

## 21 **Abstract**

22 The apparent ability of bats to harbor many virulent viruses without showing disease is likely  
23 driven by distinct immune responses that coevolved with mammalian flight and the exceptional  
24 longevity of this order. Yet our understanding of the immune mechanisms of viral tolerance is  
25 restricted to a small number of bat–virus relationships and remains poor for coronaviruses  
26 (CoVs), despite their relevance to human health. Proteomics holds particular promise for  
27 illuminating the immune factors involved in bat responses to infection, because it can  
28 accommodate especially low sample volumes (e.g., sera) and thus can be applied to both large  
29 and small bat species as well as in longitudinal studies where lethal sampling is necessarily  
30 limited. Further, as the serum proteome includes proteins secreted from not only blood cells but  
31 also proximal organs, it provides a more general characterization of immune proteins. Here, we  
32 expand our recent work on the serum proteome of wild vampire bats (*Desmodus rotundus*) to  
33 better understand CoV pathogenesis. Across 19 bats sampled in 2019 in northern Belize with  
34 available sera, we detected CoVs in oral or rectal swabs from four individuals (21.1% positivity).  
35 Phylogenetic analyses identified all vampire bat sequences as novel  $\alpha$ -CoVs most closely related  
36 to known human CoVs. Across 586 identified serum proteins, we found no strong differences in  
37 protein composition nor abundance between uninfected and infected bats. However, receiver  
38 operating characteristic curve analyses identified seven to 32 candidate biomarkers of CoV  
39 infection, including AHSG, C4A, F12, GPI, DSG2, GSTO1, and RNH1. Enrichment analyses  
40 using these protein classifiers identified downregulation of complement, regulation of  
41 proteolysis, immune effector processes, and humoral immunity in CoV-infected bats alongside  
42 upregulation of neutrophil immunity, overall granulocyte activation, myeloid cell responses, and  
43 glutathione processes. Such results denote a mostly cellular immune response of vampire bats to  
44 CoV infection and identify putative biomarkers that could provide new insights into CoV  
45 pathogenesis in wild and experimental populations. More broadly, applying a similar proteomic  
46 approach across diverse bat species and to distinct life history stages in target species could  
47 improve our understanding of the immune mechanisms by which wild bats tolerate viruses.

## 48 Introduction

49 Bats (Order: Chiroptera) are one of the most speciose mammalian clades (Gunnell and Simmons,  
50 2012; Simmons and Cirranello, 2019), and this diversity is matched by an equally high richness  
51 of viruses, many of which are zoonotic (Olival et al., 2017; Mollentze and Streicker, 2020). Bat  
52 species are the confirmed reservoir hosts for Hendra and Nipah viruses, lyssaviruses, Marburg  
53 virus, and SARS-like coronaviruses (CoVs) (Li et al., 2005; Banyard et al., 2011; Halpin et al.,  
54 2011; Amman et al., 2015). Yet with few exceptions (e.g., lyssaviruses), these pathogens seem to  
55 not cause disease in their bat hosts (Williamson et al., 2000; Watanabe et al., 2010; Munster et  
56 al., 2016). This tolerance of otherwise virulent infections is likely driven by distinct aspects of  
57 bat immunity that evolved alongside their unique ability of powered flight and their very long  
58 lifespans (Wilkinson and South, 2002; Zhang et al., 2013; Irving et al., 2021). These include but  
59 are not limited to constitutive expression of interferons (IFNs) and IFN-stimulated genes (ISGs),  
60 robust complement proteins, and a dampened inflammatory response (Zhou et al., 2016; Ahn et  
61 al., 2019; Becker et al., 2019; Banerjee et al., 2020; Jebb et al., 2020; Bondet et al., 2021).

62 Relationships between bats and CoVs specifically have been of particular interest for  
63 zoonotic risk assessment (Fischhoff et al., 2021; Becker et al., 2022). CoVs are RNA viruses  
64 found across mammals and birds, with at least seven known human viruses: two and five in the  
65 genera *Alphacoronavirus* and *Betacoronavirus* (Anthony et al., 2017b; Ye et al., 2020). A novel  
66  $\alpha$ -CoV with canine origins was recently detected in humans, but its role in zoonotic disease  
67 remains unclear (Vlasova et al., 2021). CoVs are highly diverse in bats, which are the likely  
68 ancestral hosts of  $\alpha$ - and  $\beta$ -CoVs (Woo et al., 2006, 2012; Ruiz-Aravena et al., 2021). The  
69 evolutionary origins of highly pathogenic CoVs (i.e., SARS-CoV, MERS-CoV, SARS-CoV-2)  
70 have also been ascribed to bats, but spillover has typically involved intermediate hosts rather  
71 than direct bat-to-human transmission (Li et al., 2005; Anthony et al., 2017a; Boni et al., 2020).

72 Our understanding of bat–CoV interactions and the bat immune response to infection  
73 remains limited and has stemmed mostly from experimental studies of a few select species,  
74 including *Rousettus leschenaulti*, *R. aegyptiacus*, *Artibeus jamaicensis*, and *Eptesicus fuscus*  
75 (Watanabe et al., 2010; Munster et al., 2016; van Doremalen et al., 2018; Hall et al., 2021; Ruiz-  
76 Aravena et al., 2021). *In vivo* studies have typically found short-term CoV replication and  
77 shedding without substantial weight loss or pathology, supporting viral tolerance, although some  
78 species seem to entirely resist infection. Tolerance appears driven by innate immune processes,  
79 such as increased expression of ISGs, with little adaptive immune response. *In vitro* studies have  
80 further supported bat receptor affinity for CoVs (i.e., susceptibility) but little host inflammatory  
81 response in bats (Watanabe et al., 2010; Munster et al., 2016; Ahn et al., 2019; Lau et al., 2020).

82 Despite the clear insights afforded by experiments, model bat systems are heavily limited  
83 by logistical constraints (e.g., necessity for specialized facilities, colony maintenance) and have  
84 been mostly focused on frugivorous bats, which are relatively easy to keep in captivity compared  
85 to other dietary guilds (Banerjee et al., 2019; Wang et al., 2021). Transcriptomics of key tissues  
86 (e.g., spleen) has helped advance the field by identifying immune responses to infection in a

87 wider array of species (Papenfuss et al., 2012; Davy et al., 2018; Ren et al., 2020). However,  
88 such approaches are restrictive when lethal bat sampling is limited, such as when working with  
89 threatened species, in protected habitats, or in longitudinal studies to assess how these viruses  
90 persist in bat populations. Blood transcriptomes overcome such challenges to a degree and are  
91 increasingly feasible (Huang et al., 2016, 2019), yet such assays are only informative about the  
92 immune response in the blood itself. Proteomics, on the other hand, provides a unique and more  
93 nuanced perspective into the immune system, because the blood proteome includes proteins  
94 secreted from not only blood cells but also proximal organs such as the liver (Uhlén et al., 2019).

95 Proteomics holds special promise for illuminating the innate and adaptive immune factors  
96 involved in bat responses to infection, because it can accommodate the small bat blood volumes  
97 typical of field studies (e.g., <10  $\mu$ L). Recently, we surveyed the serum proteome of wild  
98 vampire bats (*Desmodus rotundus*) (Neely et al., 2020). Owing to its diet of mainly mammal  
99 blood, this species is the primary reservoir host of rabies lyssavirus in Latin America, and alpha-  
100 and betacoronaviruses have also been identified in this species (Brandão et al., 2008; Schneider  
101 et al., 2009; Bergner et al., 2020; Alves et al., 2021). Using only 2  $\mu$ L sera from these small (25–  
102 40 gram) bats, we identified 361 proteins across five orders of magnitude, including antiviral and  
103 antibacterial components, 20S proteasome complex, and redox activity proteins. Mass  
104 spectrometry–based proteomics can thus facilitate the relative quantification of classical  
105 immunological proteins while also providing insight into proteins yet to be fully recognized for  
106 their importance in resolving viral infection (Neely et al., 2014, 2018; Geyer et al., 2017).

107 Here, we expand our recent work on serum proteomics in vampire bats in the context of  
108 CoV infection. First, by profiling the serum proteome of the same host species in an additional  
109 year of study, we provide a more general and comprehensive characterization of the wild bat  
110 immune phenotype. Second, owing to changes in regulations for importing vampire bat samples  
111 into the United States, we also assess the impact of heat inactivation, a common method of  
112 inactivating bat sera (Schulz et al., 2020), on the proteome. Lastly, and most importantly, we  
113 assess differences in the serum proteomes of wild bats with and without acute CoV infection. We  
114 aimed to identify up- and downregulated immune responses of wild bats to CoV infection, with  
115 particular interest in comparisons with results from experimental infections. We also aimed to  
116 guide the discovery of candidate serum biomarkers of viral infection. By taking an agnostic  
117 approach via discovery proteomics (Aebersold and Mann, 2016), such biomarkers could provide  
118 new and mechanistic insight into CoV pathogenesis in wild bats (Heck and Neely, 2020).

119

## 120 **Materials and Methods**

### 121 *Vampire bat sampling*

122 As part of an ongoing longitudinal study (Becker et al., 2020b), we sampled vampire bats in  
123 April 2019 in the Lamanai Archeological Reserve, northern Belize. This same population was  
124 sampled in 2015 for our earlier proteomic analysis (Neely et al., 2020). For the 19 individuals

125 included in this study, we used a harp trap and mist nets to capture bats upon emergence from a  
126 tree roost. All individuals were issued a unique incoloy wing band (3.5 mm, Porzana Inc) and  
127 identified by sex, age, and reproductive status. For sera, we collected blood by lancing the  
128 propatagial vein with 23-gauge needles followed by collection with heparinized capillary tubes.  
129 Blood was stored in serum separator tubes (BD Microtainer) for 10–20 minutes before  
130 centrifugation. Following recent CDC guidelines, all sera were inactivated for importation to the  
131 United States by heating at 56 °C for one hour. We also collected saliva and rectal samples using  
132 sterile miniature rayon swabs (1.98 mm; Puritan) stored in DNA/RNA Shield (Zymo Inc).  
133 Samples were held at –80 °C using a cryoshipper (LabRepCo) prior to long-term storage.  
134 Bleeding was stopped with styptic gel, and all bats were released at their capture location. Field  
135 protocols followed guidelines for safe and humane handling of bats from the American Society  
136 of Mammalogists (Sikes and Gannon, 2011) and were approved by the Institutional Animal Care  
137 and Use Committee of the American Museum of Natural History (AMNH IACUC-20190129).  
138 Sampling was further authorized by the Belize Forest Department via permit FD/WL/1/19(09).  
139 Serum specimens used for proteomic analysis were approved by the National Institute of  
140 Standards and Technology Animal Care and Use Coordinator under approval MML-AR19-0018.

141

#### 142 *CoV screening and phylogenetics*

143 As part of a larger viral surveillance project, we extracted and purified RNA from oral and rectal  
144 swabs using the *Quick*-RNA Viral Kit (Zymo Research). With exception of one bat, RNA from  
145 both swab types was available for all sera. We used a semi-nested PCR targeting the RNA-  
146 dependent RNA polymerase gene (RdRp) of alpha- and betacoronaviruses, following previous  
147 protocols (Monchatre-Leroy et al., 2017). Amplicons were submitted to GENEWIZ for  
148 sequencing. Resulting sequences were aligned using Geneious (Biomatters; (Kearse et al., 2012),  
149 followed by analysis using NCBI BLAST (Altschul et al., 1990). PhyML 3.0 was used to build a  
150 maximum-likelihood phylogeny of these and additional CoV sequences (Guindon et al., 2010).

151 To assess possible risk factors for CoV infection (in oral or rectal swab samples), we fit  
152 univariate logistic regression models with bat age, sex, and reproductive status as separate  
153 predictors. Because the small sample sizes used here could bias our estimates of odds ratios, we  
154 used the *logistf* package in R to implement Firth's bias reduction (Heinze and Schemper, 2002).

155

#### 156 *Proteome profiling*

157 In addition to profiling serum from the 19 bats described above, we also performed another  
158 proteomic experiment to evaluate effects of heat inactivation with previously analyzed samples  
159 collected in 2015 (Neely et al., 2020). From four non-inactivated sera, we submitted an aliquot of  
160 each sample to the heat inactivation process used for our 2019 samples (56 °C for one hour). We  
161 then processed the paired non-inactivated and heat-inactivated sera and the 19 sera in two  
162 batches using the S-Trap method for digestion with the S-Trap micro column (ProtiFi; ≤ 100 µg

163 binding capacity). Full details are provided in the Supplemental Information. Briefly, we used 2  
164  $\mu\text{L}$  (approximately 100  $\mu\text{g}$  protein) of each serum sample for digestion, and a pooled bat serum  
165 was digested across the two batches. Proteins were reduced with DL-Dithiothreitol (DTT) and  
166 alkylation with 2-chloroacetamide (CAA). Digestion was performed with trypsin at an  
167 approximate 1:30 mass ratio, followed by incubation at 47 °C for one hour. These resulting  
168 peptide mixtures were then reduced to dryness in a vacuum centrifuge at low heat before long-  
169 term storage at -80 °C. Before analysis, samples were then reconstituted with 100  $\mu\text{L}$  0.1%  
170 formic acid (volume fraction) and vortexed, followed by centrifugation at 10000  $\times g_n$  for 10  
171 minutes at 4 °C. The sample peptide concentrations were determined via the Pierce quantitative  
172 colorimetric peptide assay with a Molecular Devices SpectraMax 340PC384 microplate reader.

173 We used the same LC-MS/MS method earlier applied for vampire bat serum proteomics  
174 (Neely et al., 2020). Using the original sample randomization gave a randomized sample order,  
175 and injection volumes were determined for 0.5  $\mu\text{g}$  loading (0.21–0.44  $\mu\text{L}$  sample). The run order  
176 and data key are provided in Table S1. Peptide mixtures were analyzed using an UltiMate 3000  
177 Nano LC coupled to a Fusion Lumos Orbitrap mass spectrometer (ThermoFisher Scientific). A  
178 trap elute setup was used with a PepMap 100 C18 trap column (ThermoFisher Scientific)  
179 followed by separation on an Acclaim PepMap RSLC 2  $\mu\text{m}$  C18 column (ThermoFisher  
180 Scientific) at 40 °C. Following 10 minutes of trapping, peptides were eluted along a 60 minute  
181 two-step gradient of 5–30% mobile phase B (80% acetonitrile volume fraction, 0.08% formic  
182 acid volume fraction) over 50 minutes, followed by a ramp to 45% mobile phase B over 10  
183 minutes, ramped to 95% mobile phase B over 5 minutes, and held at 95% mobile phase B for 5  
184 minutes, all at a flow rate of 300 nL per minute. The data-independent acquisition (DIA) settings  
185 are briefly described here. The full scan resolution using the orbitrap was set at 120000, the mass  
186 range was 399 to 1200  $m/z$  (corresponding to the DIA windows used), with 40 DIA windows that  
187 were 21  $m/z$  wide, with 1  $m/z$  overlap on each side covering the range of 399 to 1200  $m/z$ . Each  
188 DIA window used higher-energy collisional dissociation at a normalized collision energy of 32  
189 with quadrupole isolation width at 21  $m/z$ . The fragment scan resolution using the orbitrap was  
190 set at 30000, and the scan range was specified as 200 to 2000  $m/z$ . Full details of the LC-MS/MS  
191 settings are in Supplemental Material. The method file (85min\_DIA\_40x21mz.meth) and mass  
192 spectrometry proteomics data have been deposited to the ProteomeXchange Consortium via the  
193 PRIDE (Perez-Riverol et al., 2022) partner repository with the dataset identifier PXD031075.

194 In our earlier analysis of vampire bat serum proteomes (Neely et al., 2020), we used  
195 Spectronaut software to analyze our DIA data. Here, we instead used the DIA-NN software suite,  
196 which uses deep neural networks for the processing of DIA proteomic experiments (Demichev et  
197 al., 2020). To search the bat samples, we used the NCBI RefSeq *Desmodus rotundus* Release  
198 100 GCF\_002940915.1\_ASM294091v2 FASTA (29,845 sequences). Our full DIA-NN settings  
199 are provided in the Supplemental Material, and search settings and the generated spectral library  
200 (\*.speclib) are included in the PRIDE submission (PXD031075). Briefly, 0.01 precursor false  
201 discovery was used, search parameters were chosen based on DIA settings, trypsin (cut at K\*,R\*  
202 but excluded cuts at \*P) was selected, and fixed modification of cysteine carbamidomethylation.



203 Since DIA-NN was made to handle protein inference and grouping assuming a UniProtKB-  
204 formatted FASTA file, and the NCBI RefSeq *Desmodus rotundus* Release 100 was used (RefSeq  
205 format), settings were chosen such that DIA-NN effectively ignored protein grouping, which can  
206 be performed on the backend following ontology mapping.

207 To additionally search for CoV proteins (Neely et al., 2020), we performed a secondary  
208 search using the same settings and the addition of a Coronaviridae FASTA (117709 sequences)  
209 retrieved from UniProtKB (2021\_03 release) using taxon identifier 1118 with all SwissProt and  
210 TrEMBL entries. Search settings are included in the PRIDE submission (PXD031075).

211 Our identified bat proteins were then mapped to human orthologs using BLAST+  
212 (Camacho et al., 2009) and a series of python scripts described previously (Neely et al., 2020) to  
213 facilitate downstream analysis using human-centric databases (see Supplemental Material for full  
214 details). In those cases where human orthologs do not exist, such as mannose-binding protein A  
215 (MBL1), we used *ad hoc* ortholog identifiers. Specifically, eight identified vampire bat proteins  
216 are not found in humans (APOR, Bpifb9a, HBE2, ICA, LGB1, MBL1, Patr-A, and REG1), and  
217 we thus used UniProt identifiers from chimpanzee, cow, horse, mouse, and pig (Table S2).

218

#### 219 *Proteomic data analyses*

220 The final data matrix of relative protein abundance for all identified proteins was stratified into  
221 two datasets for differential analysis: (i) the four 2015 samples analyzed before and after heat  
222 inactivation (Table S3) and (ii) the 19 samples collected in 2019 analyzed for CoV infection  
223 (Table S4). Our analysis also included a pooled serum sample as a quality control between the  
224 two digestion batches (Table S2), and digestion was evaluated by the number of peptide spectral  
225 matches. For formal statistical analyses, missing abundance values were imputed as half the  
226 minimum observed intensity of each given protein; however, for summary statistics (e.g., means,  
227 log<sub>2</sub>-fold change [LFC]), missing values were excluded (Lazar et al., 2016; Arioli et al., 2021).

228 For the inactivation analyses, log<sub>2</sub>-transformed protein abundance ratios were used for  
229 each paired sample. These ratios were used in a moderated *t*-test with the *limma* package in R to  
230 evaluate protein changes within sera samples before and after heat treatment (Ritchie et al.,  
231 2015), followed by Benjamini–Hochberg (BH) correction (Benjamini and Hochberg, 1995).

232 For the CoV infection analyses, we first reduced dimensionality of our protein dataset  
233 using a principal components analysis (PCA) of all identified proteins, with abundances scaled  
234 and centered to have unit variance. We then used a permutation multivariate analysis of variance  
235 (PERMANOVA) with the *vegan* package to test for differences in protein composition between  
236 uninfected and infected bats (Dixon, 2003). Next, we used a two-sided Wilcoxon rank sum test  
237 in MATLAB to detect differentially abundant proteins between uninfected and infected bats. We  
238 again used the BH correction to adjust for the inflated false discovery rate. We also calculated  
239 LFC as the difference of mean log<sub>2</sub>-transformed counts between uninfected and infected bats. To  
240 next identify candidate biomarkers of CoV infection, we used receiver operating characteristic

241 (ROC) curve analysis. We used a modified function (<https://github.com/dnafinder/roc>) in  
242 MATLAB to generate the area under the ROC curve (AuROC) as a measure of classifier  
243 performance with 95% confidence intervals, which we calculated with standard error,  $\alpha = 0.05$ ,  
244 and a putative optimum threshold closest to 100% sensitivity and specificity (Hanley and  
245 McNeil, 1982; Pepe, 2003). We considered proteins with AuROC  $\geq 0.9$  to be strict classifiers of  
246 CoV positivity, whereas proteins with AuROC  $\geq 0.8$  but less than 0.9 were considered less  
247 conservative; all other proteins were considered to be poor classifiers (Mallick et al., 2007).  
248 Variation in the abundance of strict classifiers by CoV infection status was visualized using  
249 boxplots. We also visualized the matrix of all candidate serum biomarkers with the *heatmap*  
250 package, using log<sub>2</sub>-transformed protein abundances (scaled and centered around zero) and  
251 Ward's hierarchical clustering method (Murtagh and Legendre, 2014; Kolde and Kolde, 2015).

252 Lastly, we interrogated up- and down-regulated responses to CoV infection using gene  
253 ontology (GO) analysis. First, we programmatically accessed GO terms for all identified proteins  
254 using their associated UniProt identifiers and the *UniprotR* package (Soudy et al., 2020). Next,  
255 we used the *gprofiler2* package as an interface to the g:Profiler tool g:GOST for functional  
256 enrichment tests (Raudvere et al., 2019; Kolberg et al., 2020). Enrichment was performed for all  
257 candidate protein biomarkers based on AuROC, with up- and downregulated proteins determined  
258 using log<sub>2</sub>-fold change. We ranked our proteins by AuROC to conduct incremental enrichment  
259 testing, with the resulting *p*-values adjusted by the Set Counts and Sizes (SCS) correction. We  
260 restricted our data sources to GO biological processes, the Kyoto Encyclopedia of Genes and  
261 Genomes (KEGG), and WikiPathways (WP). We ran the enrichment tests for both our strict and  
262 less-conservative protein classifiers. We note that the eight bat proteins lacking human orthologs  
263 all had AuROC  $< 0.8$  and therefore did not require any manual GO and pathway mapping.

264

## 265 **Results**

### 266 *Bat demographics and CoV positivity*

267 Our sample of 19 vampire bats included for proteomic analyses consisted predominantly of  
268 females (84 %) and adults (79 %). One male was reproductively active, whereas four females  
269 were lactating ( $n = 3$ ) or pregnant ( $n = 1$ ). Four of the 19 sera samples had paired oral or rectal  
270 swabs test positive through PCR for CoVs (21.1 %); sequences are available in GenBank under  
271 accession numbers OM240577–80. Phylogenetic analyses of the four sequenced amplicons  
272 confirmed all positives in the genus *Alphacoronavirus* (Fig. 1A). All four vampire bat sequences  
273 are novel  $\alpha$ -CoVs and displayed the most genetic similarity (94.6–97.3 %) to human CoVs  
274 (HCoV; HCoV-NL63 and HCoV-229E) rather than known bat  $\alpha$ -CoVs, including those  
275 previously found in other vampire bat colonies and other Neotropical bat species more broadly  
276 (Asano et al., 2016; Bittar et al., 2020). Univariate logistic regressions did not find significant  
277 (unadjusted) effects of any bat demographics on CoV positivity. Males were no more likely than  
278 females to be infected (OR = 2.31,  $p = 0.49$ ), although non-reproductive individuals (OR = 6.16,  
279  $p = 0.17$ ) and subadults (OR = 5.40,  $p = 0.13$ ) were weakly more likely to be positive (Fig. 1B).



280

### 281 *Serum proteome characterization*

282 Bottom-up proteomics using DIA identified 586 proteins in the 19 vampire bat sera samples,  
283 with relative quantification covering 5.6 orders of magnitude (Fig. 2A; Table S4). The overall  
284 number of identified proteins in our former analysis (i.e., 361 proteins) (Neely et al., 2020) and  
285 the current dataset was within the same order of magnitude and had a similar dynamic range  
286 (approximately  $10^3$ – $10^8$  in our prior analysis versus  $10^4$ – $10^9$  in the current analysis). There was  
287 also high overlap in identified proteins between the datasets (91 % of the original 361 proteins  
288 were included in our analysis here; Fig. S1) and similar protein ranks (Table S5). Although the  
289 prior and current study have low sample sizes ( $n = 17$  and 19, respectively) and were sampled  
290 across different years, the similarity in protein abundance, composition, and ranks suggest that  
291 these proteomic patterns (e.g., guanylate-binding proteins, circulating 20S proteasome, and  
292 hyaluronidase-1) are not the result of sampling bias and are instead likely a consistent vampire  
293 bat phenotype, with improved protein identifications differences driven by technical advances.

294

### 295 *Effects of heat inactivation*

296 One key difference between analyses here and our prior proteomic study of this vampire bat  
297 population is unknown technical artifacts from heat inactivation. To assess these possible effects,  
298 we compared proteomes before and after treatment of four serum samples used in our prior study  
299 (Neely et al., 2020). Using a moderated  $t$ -test of the four paired sera samples, 34 proteins showed  
300 significant changes after heat inactivation (unadjusted  $p < 0.05$ ), but no differences remained  
301 after BH adjustment (even using a liberal adjusted  $p < 0.3$ ). Although we found no statistically  
302 significant changes in protein abundance with heat inactivation, we observed a mean 28%  
303 absolute change across the proteome, with a maximum mean 500% absolute change. Most  
304 proteins (52.6%) changed less than 17% in response to heat inactivation (Fig. S2; Table S3).

305

### 306 *Mining for CoV proteins*

307 Given prior proteomic identification of putative viral proteins in undepleted serum, including  
308 CoVs (Neely et al., 2020), we broadened our search space to include any CoV proteins. As  
309 observing non-host proteins is a rare event, we used additional stringent criteria to verify any  
310 initial CoV peptide spectral matches (see Supplemental Material). Of the 749 CoV peptide  
311 spectral matches, none passed these more stringent criteria (Table S6). Thus we cannot firmly  
312 say that viral proteins were identified in this set of undepleted sera, regardless of CoV status.

313

### 314 *Proteomic differences with CoV infection*

315 To assess differences in the serum proteome between CoV-infected and uninfected bats, we first  
316 used multivariate tests. Across the 586 identified proteins, the first two PCs explained 25.46 % of  
317 the variance in serum proteomes (Fig. S3). A PERMANOVA found no difference in proteome  
318 composition by viral infection status ( $F_{1,17} = 0.99$ ,  $R^2 = 0.05$ ,  $p = 0.46$ ), although variation was  
319 greater in infected bats. Using Wilcoxon rank sum tests, we initially identified 22 proteins with  
320 significantly different abundance in CoV-infected bats (unadjusted  $p < 0.05$ ), but no differences  
321 likewise remained after BH adjustment (even using a liberal adjusted  $p < 0.3$ ; Fig. 2B).

322 In contrast to multivariate and differential abundance tests, ROC curve analyses  
323 identified 32 candidate protein biomarkers of CoV infection using strict ( $n = 7$ ,  $\text{AuROC} \geq 0.9$ )  
324 and less-conservative ( $n = 25$ ,  $0.9 > \text{AuROC} \geq 0.8$ ) classifier cutoffs (Fig. 2). Considering the  
325 strict classifier cutoff, four *Desmodus* proteins were positive predictors and were weakly  
326 elevated in CoV-infected bats: RNH1 (ribonuclease inhibitor;  $\text{AuROC} = 0.97$ ,  $\text{LFC} = 0.77$ ),  
327 AHSG (alpha-2-HS-glycoprotein;  $\text{AuROC} = 0.91$ ,  $\text{LFC} = 0.52$ ), DSG2 (desmoglein-2;  $\text{AuROC}$   
328  $= 0.90$ ,  $\text{LFC} = 0.16$ ), and GSTO1 (glutathione S-transferase omega-1;  $\text{AuROC} = 0.90$ ,  $\text{LFC} =$   
329  $0.98$ ). Conversely, three proteins were instead negative predictors and were reduced in CoV-  
330 infected bats: C4A (complement C4A;  $\text{AuROC} = 0.97$ ,  $\text{LFC} = -0.45$ ), F12 (coagulation factor  
331 XII;  $\text{AuROC} = 0.93$ ,  $\text{LFC} = -0.51$ ), and GPI (glucose-6-phosphate isomerase;  $\text{AuROC} = 0.03$ ,  
332  $\text{LFC} = -1.79$ ; Fig. 2C). The total 32 candidate biomarkers provided clear discriminatory power in  
333 differentiating the phenotypes of uninfected and infected vampire bats (Fig. 3).

334 We lastly interrogated up- and down-regulated responses to CoV infection using GO  
335 terms. Across the serum proteome ( $n = 586$ ), top biological processes ( $\geq 30$  proteins; Fig. S4)  
336 included neutrophil degranulation (18.3 %), platelet degranulation (8.5 %), post-translational  
337 protein modification (8.5 %), innate immune response (7.3 %), cellular protein metabolic process  
338 (6.5 %), blood coagulation (5.8%), cell adhesion (5.5 %), signal transduction (5.5 %), viral  
339 processes (5.5 %), negative regulation of apoptotic process (5.3 %), inflammatory response (5.1  
340 %), and regulation of complement activation (5.1 %). Enrichment analyses identified multiple  
341 functional protein differences between uninfected and infected bats after SCS correction (Fig. 4).  
342 When considering only strict protein biomarkers ( $\text{AuROC} \geq 0.9$ ), CoV-infected bats displayed  
343 downregulation of the complement system and regulation of proteolysis. When also considering  
344 less-conservative biomarkers ( $\text{AuROC} \geq 0.8$ ), infected bats also had down-regulation of immune  
345 effector processes and humoral immunity. Enrichment analysis of all biomarkers also identified  
346 up-regulated processes including neutrophil-mediated immunity, overall granulocyte activation,  
347 myeloid cell responses, and glutathione processes, denoting a largely cellular immune response.

348

## 349 Discussion

350 Despite an increasing interest in bat–virus interactions, especially for CoVs given their human  
351 health relevance (Anthony et al., 2017b; Becker et al., 2022), we still have limited insights into  
352 the immune mechanisms involved in infection of bats (Ruiz-Aravena et al., 2021). Here, we used  
353 serum proteomics to broadly profile the immune phenotype of wild vampire bats in the presence

354 of relatively common CoV infections. Novel  $\alpha$ -CoVs detected in these bats had little association  
355 with serum protein composition nor abundance, although ROC curve analyses identified 7–32  
356 candidate biomarkers of CoV infection, including AHSB, C4A, F12, GPI, DSG2, GSTO1, and  
357 RNH1. Enrichment analyses using these protein classifiers identified strong downregulation of  
358 complement, regulation of proteolysis, immune effector processes, and humoral immunity in  
359 CoV-infected bats alongside an upregulation of neutrophil immunity, overall granulocyte  
360 activation, myeloid cell responses, and glutathione processes. Such results denote a mostly  
361 cellular immune response of vampire bats to CoVs and further identify putative biomarkers that  
362 could provide new insights into CoV pathogenesis in both wild and experimental populations.

363 Much bat immunology work to date has understandably focused on model bat systems  
364 under captive conditions (Banerjee et al., 2020; Irving et al., 2021). However, identifying the  
365 immune correlates of infection is especially important for wild populations, where susceptibility  
366 and tolerance to infection, alongside other immunological processes, can vary based on habitat  
367 quality and host life history (e.g., reproduction) (Becker et al., 2020a). Such efforts could provide  
368 a mechanistic basis for establishing when and where pathogen pressure from bats is greatest and  
369 thus help predict viral spillover (Plowright et al., 2016; Becker et al., 2021). Unlike some other  
370 global profiling techniques, proteomics has the benefit of leveraging the small blood volumes  
371 that can be obtained non-lethally from most small bats (e.g., members of the Yangochiroptera,  
372 including over 1000 species) and thus is especially amenable to the long-term, mark–recapture  
373 studies required to study bat virus dynamics (Plowright et al., 2019; Heck and Neely, 2020). To  
374 facilitate this work, we here built on our prior proteomic characterization of *Desmodus rotundus*  
375 (Neely et al., 2020). We identified a core serum protein phenotype for this species from multiple  
376 years of sampling that could serve as a reference for long-term proteomic studies, although  
377 technical advances (e.g., DIA-NN) likely contributed to an expanded protein repertoire in the  
378 current study. We also assessed the impacts of heat treatment, a common inactivation method for  
379 sera, given recent shifts in United States importation regulations. Artifacts from heat inactivation  
380 were not sufficiently conserved to be statistically significant, and most serum proteins had small  
381 changes in abundance before and after this treatment. Yet given the extent of such changes, we  
382 suggest original samples should typically not be analyzed with heated samples for comparative  
383 purposes. In contexts where sera inactivation is required, however, heat treatment across samples  
384 should not bias characterization of bat serum proteomes. Such optimizations could next be  
385 applied across longitudinal timepoints to more broadly study bat–virus interactions in the wild.

386 We here focused this initial study on CoVs, which have been previously characterized as  
387 genetically diverse ( $\alpha$ - and  $\beta$ -CoVs) in Neotropical bats, including but not limited to *Desmodus*  
388 *rotundus* (Brandão et al., 2008; Anthony et al., 2013; Corman et al., 2013; Bergner et al., 2020).  
389 Our detection of CoVs from a northern Belize colony of vampire bats in swab samples with  
390 paired sera (4/19) was higher than other CoV surveys in this species (Anthony et al., 2013;  
391 Asano et al., 2016; Wray et al., 2016; Alves et al., 2021), although future studies with larger  
392 sample sizes are needed to test if this represents a true geographic difference in virus prevalence.  
393 Yet despite many available CoV sequences in GenBank from diverse bat surveys, all CoVs

394 detected here fell within the genus *Alphacoronavirus* but outside of known bat  $\alpha$ -CoV clades.  
395 Instead, these viruses were more closely related to human  $\alpha$ -CoVs, specifically HCoV-NL63 and  
396 HCoV-229E, suggesting greater genetic diversity of CoVs within vampire bats than previously  
397 recognized. Similarly, such results further suggest the possibility of high zoonotic potential (or  
398 spillback) for vampire bat CoVs, which likely varies based on geography given the high degree  
399 of genetic differentiation across the broad distribution of *Desmodus rotundus* (Martins et al.,  
400 2009; Streicker et al., 2016; Bergner et al., 2021). Such findings should be confirmed with larger  
401 sample sizes and characterization, including *in vitro* assessments and attempts at virus isolation.

402 Despite identifying CoV infection in a small number of bat samples, we were unable to  
403 detect CoV proteins in the serum proteomes. Previously, we detected two CoV peptides in sera  
404 from this population, but these were likely at the edge of detection limits (Neely et al., 2020). As  
405 such detection limits are susceptible to technical artifacts, including but not limited to sample  
406 handling, protein processing, or instrument performance, heat inactivation could have affected  
407 our ability to identify similar peptides in these bat samples, especially for bats positive for CoVs  
408 by PCR. Additionally, our ability to detect viral proteins may have been further restricted by  
409 ongoing limitations in applying proteomics to wild species. In humans, over 3000 serum proteins  
410 can be detected by mass spectrometry after depletion of the most abundant proteins (Uhlén et al.,  
411 2019). However, using antibody-based depletion techniques is not an effective strategy in non-  
412 human mammals (Neely et al., 2014), such that undepleted serum proteomics in bats will be  
413 limited to the top 300–600 proteins, with false negatives for low abundance proteins such as  
414 those of viruses (Anderson and Anderson, 2002). Alternatively, lack of detection of CoV  
415 proteins in sera despite detection of CoV RNA in oral and rectal swabs could indicate tropism, as  
416 CoVs have been more readily detected in bat feces and saliva than in blood (Smith et al., 2016).

417 Using our novel  $\alpha$ -CoVs, we then tested for differential composition and abundance of  
418 serum proteins between uninfected and infected vampire bats. In both cases, we found negligible  
419 overall differences in serum proteomes with CoV infection. However, such null results should be  
420 qualified by the challenges posed to differential abundance tests by sample imbalance, given the  
421 small number of infected relative to uninfected bats (Yang et al., 2006). To partly address this  
422 imbalance, we used ROC curve analyses to identify proteins with strict (AuROC  $\geq 0.9$ ;  $n = 7$ )  
423 and less conservative (AuROC  $\geq 0.8$ ;  $n = 25$ ) classifier ability for infection (Arthur et al., 2014;  
424 Neely et al., 2014). The unbiased query of proteins in relation to infection through proteomics  
425 can in turn result in detection of unexpected candidate biomarkers and new insights into CoV  
426 pathogenesis in bats. For example, we identified increased ribonuclease inhibitor (RNH1) as a  
427 putative biomarker. RNH1 inhibits RNase 1 and blocks extracellular RNA degradation, possibly  
428 resulting in increased tumor necrosis factor (TNF)- $\alpha$  activation (Zechendorf et al., 2020). Prior  
429 cell line studies of *Eptesicus fuscus* have shown limited production of TNF- $\alpha$  upon stimulation  
430 (Banerjee et al., 2017), whereas those of *Pteropus alecto* have suggested an induced TNF- $\alpha$   
431 response (Ahn et al., 2019). Whether greater abundance of pro-inflammatory cytokines such as  
432 TNF- $\alpha$  occur with CoV infection in bats would thus be a fruitful area for future work based on  
433 these RNH1 differences. Similarly, we identified lower complement C4A (one of two C4

434 isotypes) as another putative biomarker. In humans, lower complement C4A and C3 can signal  
435 elevated autoimmunity (Walport, 2002; Wang and Liu, 2021), and decreased complement C4  
436 and C3 in COVID-19 patients also corresponds to disease severity (Zinellu and Mangoni, 2021).  
437 The processes that shape serum complement, namely complement synthesis, activation, and  
438 clearance, remain poorly characterized in bats (Becker et al., 2019), but the identification of C4A  
439 as a classifier could suggest specific explorations into how complement affects CoV infection.

440 Other candidate biomarkers also had more direct implications for the antiviral response in  
441 bats. AHS (alpha-2-HS-glycoprotein) is a negative acute phase reactant (Lebreton et al., 1979)  
442 and here was a positive predictor of CoV infection. In humans, elevated AHS is accordingly  
443 protective against progression of disease caused by SARS-CoV (Zhu et al., 2011), and decreased  
444 inflammation could also contribute to viral tolerance in bats. We also identified poly(rC)-binding  
445 protein 1 (PCBP1) as a positive, albeit weaker, predictor of CoV infection (AuROC = 0.87). This  
446 RNA-binding protein is upregulated in activated T cells to control effector T cells converting  
447 into regulatory T cells and thus stabilizes the innate immune response (Ansa-Addo et al., 2019,  
448 2020); PCBP1 may also prevent virus-related inflammation (Zhou et al., 2012). Whereas human  
449 patients with prolonged SARS-CoV-2 infections showed lower PCBP1 compared to patients with  
450 short-term infections (Yang et al., 2021), bats with CoV infection here had elevated PCBP1 and  
451 more generally harbor more PCBP1 than humans (Neely et al., 2020). Despite focusing on two  
452 different viral genera, such results suggest both similarities and differences in how bats and  
453 humans may respond to CoV infection. More generally, the list of such candidate biomarkers  
454 identified here can be used to create accurate, sensitive, quantitative, and bat-specific parallel  
455 reaction monitoring mass spectrometry-based protein assays (Neely et al., 2013, 2015). Such  
456 assays could facilitate more thorough investigations into bat immune response to CoV infection.

457 In addition to identifying candidate biomarkers, we also leveraged these proteins to more  
458 generally assess broad up- and downregulated biological processes with CoV infection through  
459 enrichment analyses. Using all candidate biomarkers, we found that CoV-infected bats displayed  
460 downregulation of the complement system, regulation of proteolysis, immune effector processes,  
461 and humoral immunity while also showing upregulated neutrophil-mediated immunity, overall  
462 granulocyte activation, myeloid cell responses, and glutathione processes. These results in part  
463 support findings from limited experimental infections of select bat species, which have shown  
464 little humoral response to CoVs (Munster et al., 2016; van Doremalen et al., 2018). Yet while  
465 *Rousettus aegyptiacus* challenged with SARS-like CoVs did not show hematological changes  
466 following infection (van Doremalen et al., 2018), CoV-infected vampire bats here had largely  
467 upregulated cellular immune responses. Similarly, experimental studies have suggested bat  
468 tolerance of CoVs to be driven by upregulation of cytokine responses and a downregulated  
469 inflammatory response (Munster et al., 2016; Ahn et al., 2019; Lau et al., 2020), but we did not  
470 find GO terms related to cytokines or inflammation in our analyses. Such discrepancies could  
471 again result from our ability to only detect the top 300–600 proteins without antibody-based  
472 depletion, which could cause low-abundance proteins (including but not limited to IFNs) being  
473 especially difficult to characterize here (Anderson and Anderson, 2002). Alternatively, these



474 differences could reflect distinct immune responses of bats for  $\alpha$ -CoV infection, given that  
475 experimental studies to date have focused on  $\beta$ -CoVs. Additionally, these findings could also  
476 signal immunological variation within and among bat clades, given that *Desmodus rotundus* and  
477 the closely related *Artibeus jamaicensis* may respond differently to CoVs (Munster et al., 2016).

478 Future proteomic analyses across bat species in the wild could provide a tractable means  
479 to broadly characterize host responses to viruses, including but not limited to hypothesized  
480 immune mechanisms of tolerance in this order of mammals and to infection with diverse CoVs.  
481 By leveraging the benefits of proteomics to quantify hundreds of proteins from the small sera  
482 volumes that can be obtained from most bat species (Uhlén et al., 2019; Neely et al., 2020), such  
483 analyses could evaluate whether particular immune responses to viruses such as CoVs are  
484 conserved across bats (e.g., downregulation of humoral immunity) and which may be a feature of  
485 particular bat clades. In particular, further comparative proteomic analyses across Neotropical  
486 bats, including both additional members of the Phyllostomidae as well as sister families such as  
487 the Mormoopidae (Rojas et al., 2016), would illuminate whether vampire bats have particular  
488 immunological relationships with CoVs that may facilitate viral tolerance. As suggested in our  
489 work here on *Desmodus rotundus*, such studies could also identify putative biomarkers that may  
490 suggest novel mechanisms of pathogenesis and facilitate development of protein-specific assays  
491 to improve the resource base for studying the immunology of wild bats and bat–virus dynamics.

492

#### 493 **Conflict of interest**

494 The authors declare no conflicts of interest.

495

#### 496 **Author contributions**

497 DJB, MBF, and NBS conducted fieldwork; GL and RFR ran CoV diagnostics; MGJ, AMB, and  
498 BAN conducted proteomic analyses and bioinformatics; DJB and BAN analyzed data; and DJB  
499 and BAN wrote the manuscript with contributions from all coauthors.

500

#### 501 **Funding**

502 This work was supported by National Geographic (NGS-55503R-19 to DJB, MBF, and NBS)  
503 and funds provided by Indiana University (GL, RFR) and College of Charleston (MGJ, AMB).

504

#### 505 **Acknowledgements**

506 For assistance with bat sampling logistics and research permits, we thank Mark Howells, Melissa  
507 Ingala, Kelly Speer, Neil Duncan, and the staff of the Lamanai Field Research Center.

508 Identification of certain commercial equipment, instruments, software, or materials does not

509 imply recommendation or endorsement by the National Institute of Standards and Technology,  
510 nor does it imply that the products identified are necessarily the best available for the purpose.

511

512 **Data availability statement**

513 The raw mass spectrometry proteomics data, associated LC-MS/MS method files, spectral  
514 libraries, FASTA, and metadata have been deposited to the ProteomeXchange Consortium via  
515 the PRIDE partner repository (Perez-Riverol et al., 2022) with the dataset identifier PXD031075.  
516 Vampire bat CoV sequences are available in GenBank under accession numbers OM240577–80.

517 **Figures and legends**

518

519 Figure 1. Phylogeny and distribution of CoV infections in Belize vampire bats. (A) Sequences  
 520 from PCR-positive oral or rectal swabs ( $n = 4$ ) were aligned with genetically similar (NCBI  
 521 BLAST) and representative CoV sequences from other Neotropical bat species. Nodes display  
 522 bootstrap support from maximum likelihood estimation; only values greater than 80% are shown.  
 523 (B) Prevalence of alphacoronavirus infection in bats with paired sera samples alongside 95%  
 524 confidence intervals (Wilson's method) for key bat demographic variables. Point estimates of  
 525 infection prevalence (oral and rectal swabs pooled) are scaled by sample size per covariate.

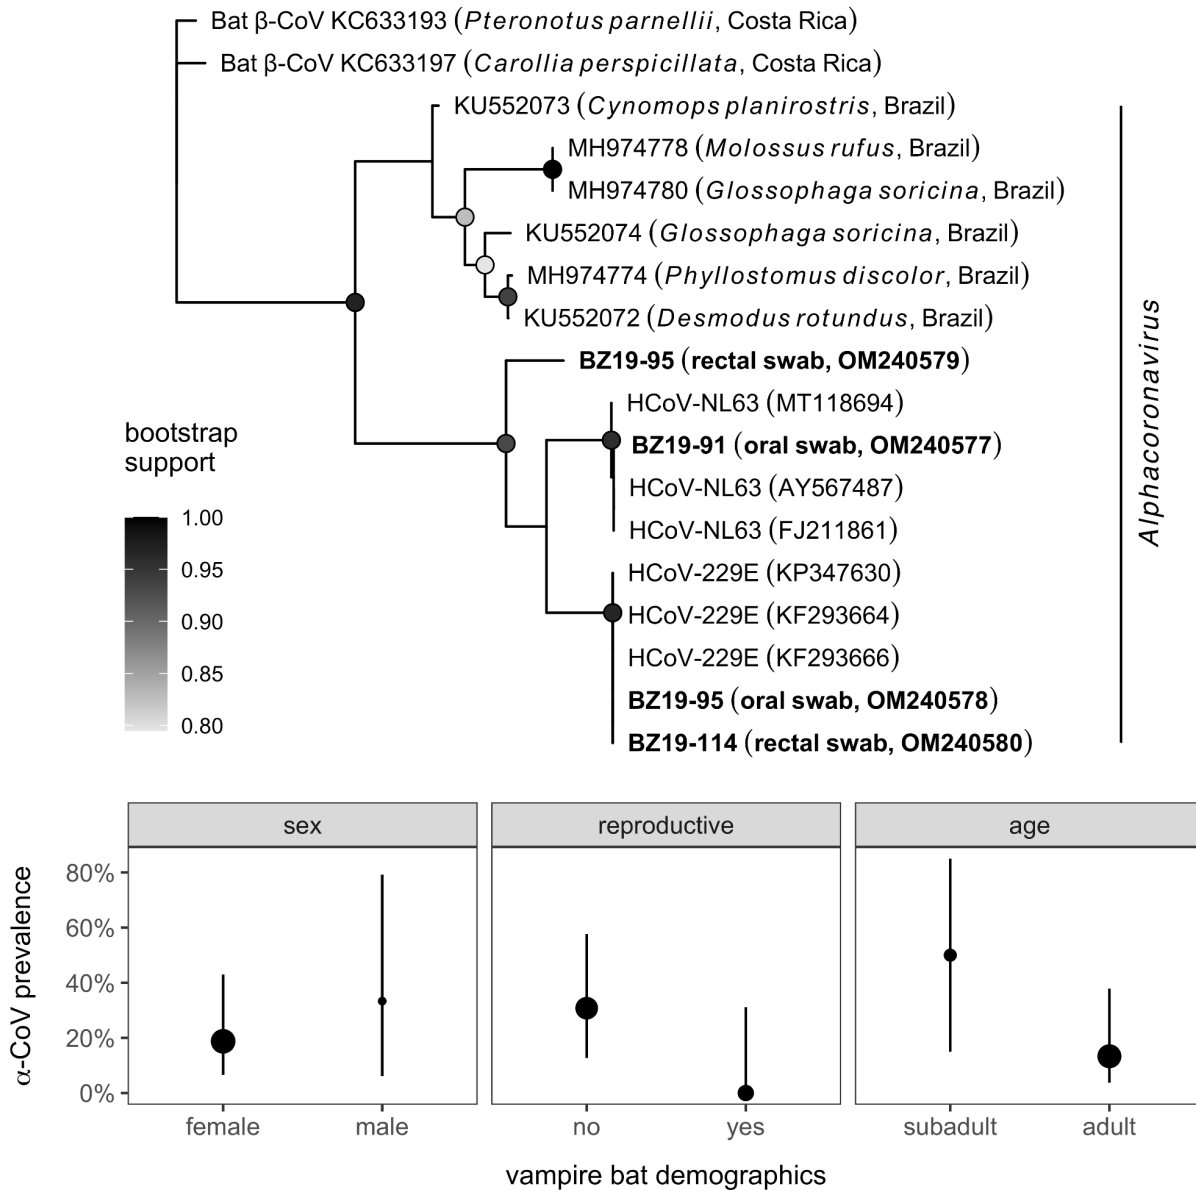

526

527 Figure 2. Serum protein abundance and biomarkers of CoV infection in vampire bats. (A) Mean  
528 abundance of the 586 proteins was plotted with corresponding rank to illustrate the dynamic  
529 range of the serum proteome. The inset displays the distribution of AuROC values for protein  
530 biomarkers of CoV infection alongside cutoffs of 0.8 and 0.9 for strict and less-conservative  
531 biomarkers. (B) Comparison of mean protein abundance for uninfected and infected bats across  
532 all proteins; the dashed line shows the 1:1 reference. For both plots, less-conservative and strict  
533 biomarkers are shown in dark gray and black, with the latter labeled with gene symbols (AHSG,  
534 alpha-2-HS-glycoprotein; C4A, complement C4A; F12, coagulation factor XII; GPI, glucose-6-  
535 phosphate isomerase; DSG2, desmoglein-2; GSTO1, glutathione S-transferase omega-1; RNH1,  
536 ribonuclease inhibitor). Missing values were excluded prior to determining mean abundances.  
537 (C) Protein abundance between uninfected and infected bats for strict biomarkers of CoV  
538 positivity; boxplots are overlaid by raw data jittered to reduce overlap.

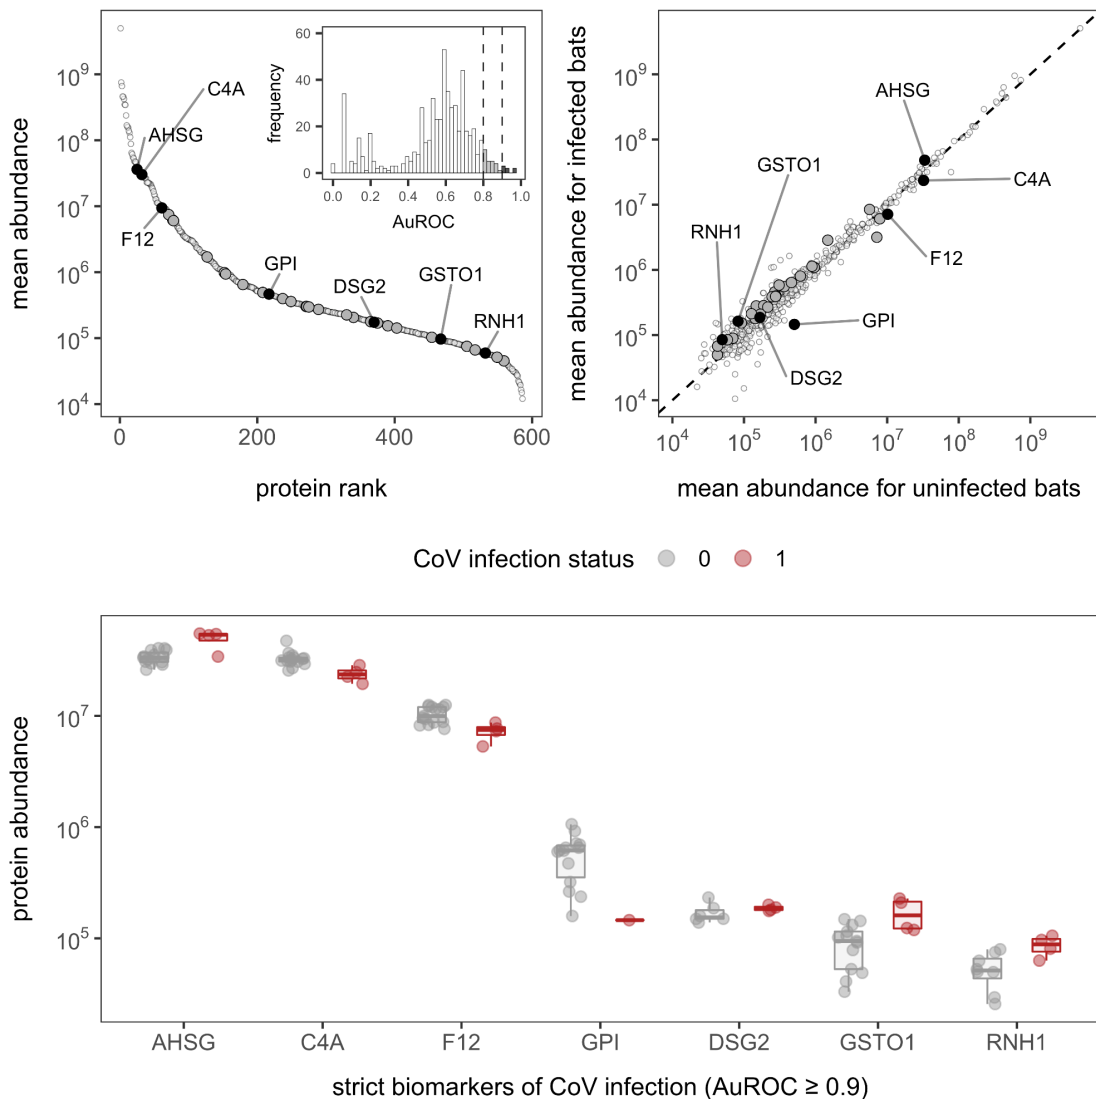

539

540 Figure 3. Heatmap of  $\log_2$ -transformed abundance for all candidate serum biomarkers of CoV  
541 infection ( $n = 32$ ), scaled to a mean of zero. Rows display individual bats, while columns display  
542 proteins as gene symbols; those with  $\text{AuROC} \geq 0.9$  are marked with an asterisk. CoV infection  
543 status is shown at the top of the heatmap. Clustering used Ward's hierarchical method (Murtagh  
544 and Legendre, 2014; Kolde and Kolde, 2015). Missing abundance values are shown as blank.  
545

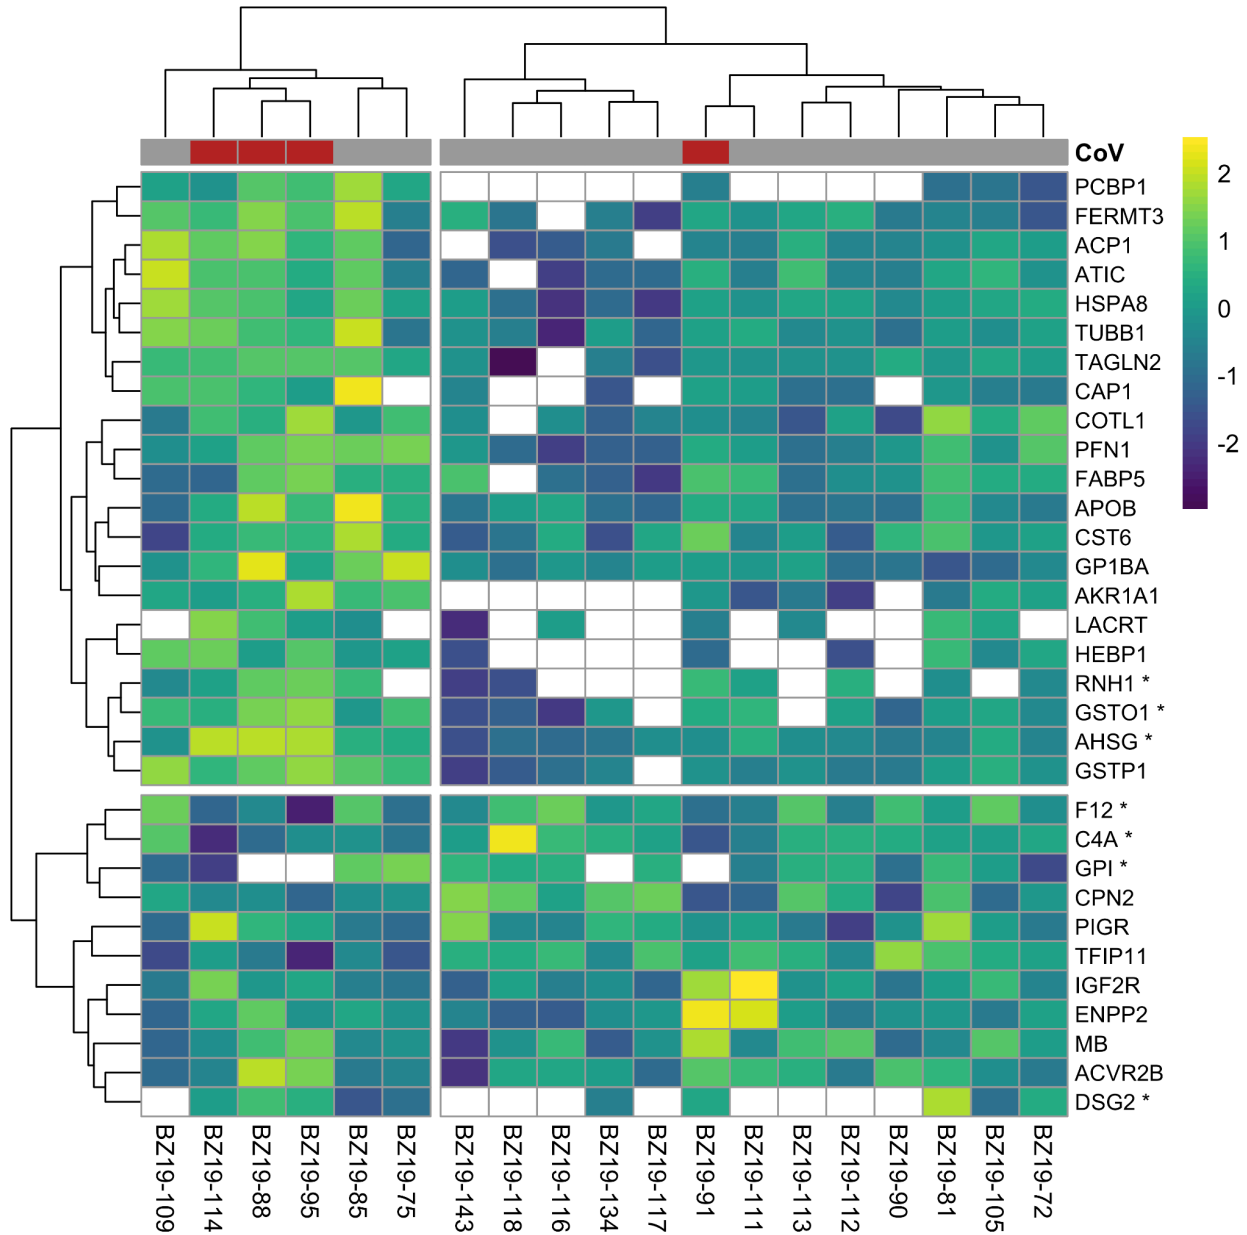



547 Figure 4. Enrichment analyses of the 32 candidate biomarkers of CoV infection, stratified by  
 548 less-conservative (AuROC  $\geq 0.8$ ) and strict (AuROC  $\geq 0.9$ ) classifiers. Biological processes with  
 549 significant enrichment in CoV-infected bats after SCS correction are displayed, with up- and  
 550 downregulated processes shown in red and blue, respectively. Processes are labeled by source.

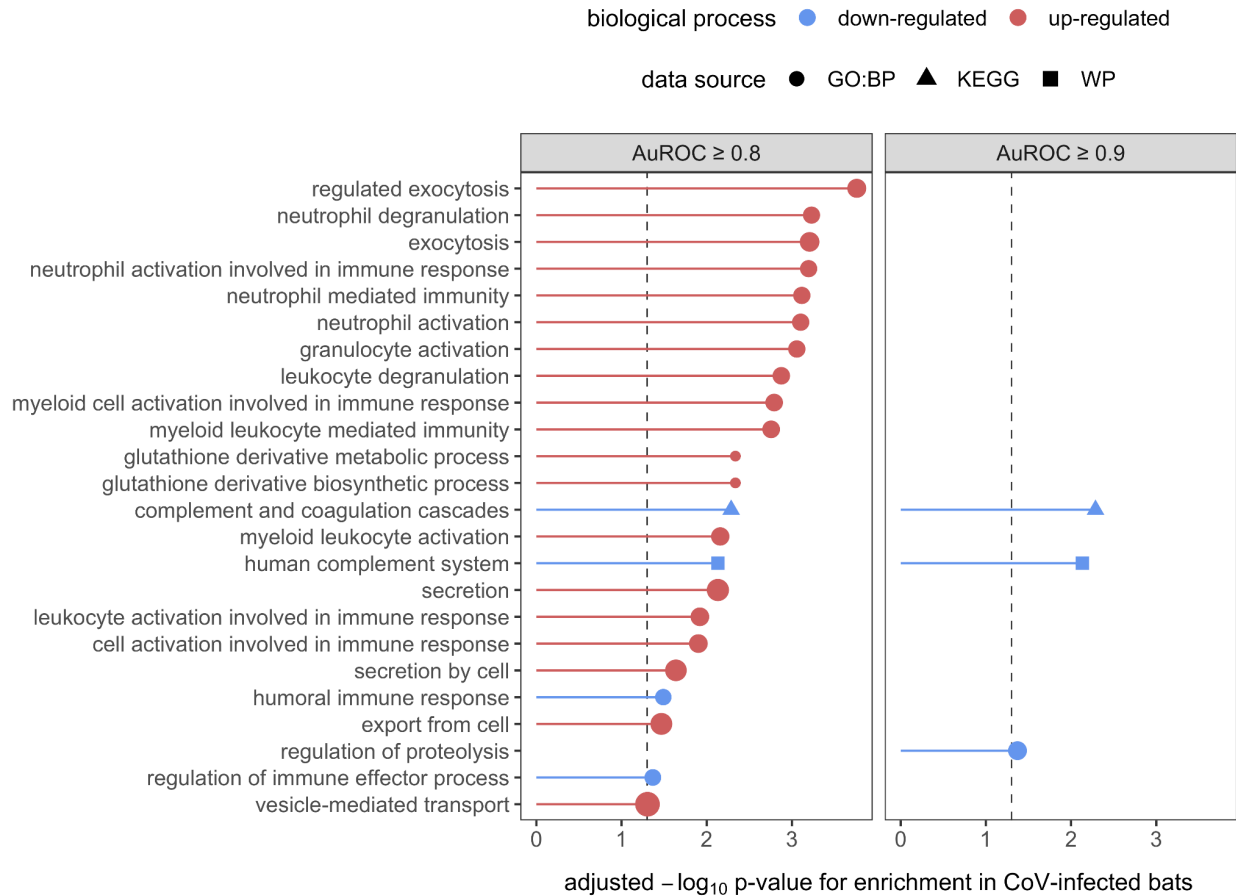

551

## 552 References

- 553 Aebersold, R., and Mann, M. (2016). Mass-spectrometric exploration of proteome structure and  
554 function. *Nature* 537, 347–355.
- 555 Ahn, M., Anderson, D. E., Zhang, Q., Tan, C. W., Lim, B. L., Luko, K., et al. (2019). Dampened  
556 NLRP3-mediated inflammation in bats and implications for a special viral reservoir host.  
557 *Nature microbiology* 4, 789–799.
- 558 Altschul, S. F., Gish, W., Miller, W., Myers, E. W., and Lipman, D. J. (1990). Basic local  
559 alignment search tool. *J. Mol. Biol.* 215, 403–410.
- 560 Alves, R. S., do Canto Olegário, J., Weber, M. N., da Silva, M. S., Canova, R., Sauthier, J. T., et  
561 al. (2021). Detection of coronavirus in vampire bats (*Desmodus rotundus*) in southern  
562 Brazil. *Transbound. Emerg. Dis.* doi:10.1111/tbed.14150.
- 563 Amman, B. R., Jones, M. E. B., Sealy, T. K., Uebelhoer, L. S., Schuh, A. J., Bird, B. H., et al.  
564 (2015). Oral shedding of Marburg virus in experimentally infected Egyptian fruit bats  
565 (*Rousettus aegyptiacus*). *J. Wildl. Dis.* 51, 113–124.
- 566 Anderson, N. L., and Anderson, N. G. (2002). The human plasma proteome: history, character,  
567 and diagnostic prospects. *Mol. Cell. Proteomics* 1, 845–867.
- 568 Ansa-Addo, E. A., Huang, H.-C., Iamsawat, S., Yu, X.-Z., Howe, P. H., and Li, Z. (2019). RNA-  
569 binding protein PCBP1 shapes tolerance and immune response by constraining the  
570 formation of regulatory T cells. *The Journal of Immunology* 202, 57.12–57.12.
- 571 Ansa-Addo, E. A., Huang, H.-C., Riesenber, B., Iamsawat, S., Borucki, D., Nelson, M. H., et al.  
572 (2020). RNA binding protein PCBP1 is an intracellular immune checkpoint for shaping T  
573 cell responses in cancer immunity. *Sci Adv* 6, eaaz3865.
- 574 Anthony, S. J., Gilardi, K., Menachery, V. D., Goldstein, T., Ssebide, B., Mbabazi, R., et al.  
575 (2017a). Further Evidence for Bats as the Evolutionary Source of Middle East Respiratory  
576 Syndrome Coronavirus. *MBio* 8. doi:10.1128/mBio.00373-17.
- 577 Anthony, S. J., Johnson, C. K., Greig, D. J., Kramer, S., Che, X., Wells, H., et al. (2017b).  
578 Global patterns in coronavirus diversity. *Virus Evol* 3, vex012.
- 579 Anthony, S. J., Ojeda-Flores, R., Rico-Chávez, O., Navarrete-Macias, I., Zambrana-Torrel, C.  
580 M., Rostal, M. K., et al. (2013). Coronaviruses in bats from Mexico. *J. Gen. Virol.* 94,  
581 1028–1038.
- 582 Arioli, A., Dagliati, A., Geary, B., Peek, N., Kalra, P. A., Whetton, A. D., et al. (2021).  
583 OptiMissP: A dashboard to assess missingness in proteomic data-independent acquisition  
584 mass spectrometry. *PLoS One* 16, e0249771.
- 585 Arthur, J. M., Hill, E. G., Alge, J. L., Lewis, E. C., Neely, B. A., Janech, M. G., et al. (2014).  
586 Evaluation of 32 urine biomarkers to predict the progression of acute kidney injury after

- 587 cardiac surgery. *Kidney Int.* 85, 431–438.
- 588 Asano, K. M., Hora, A. S., Scheffer, K. C., Fahl, W. O., Iamamoto, K., Mori, E., et al. (2016).  
589 Erratum to: Alphacoronavirus in urban Molossidae and Phyllostomidae bats, Brazil. *Virologica  
590 J.* 13, 124.
- 591 Banerjee, A., Baker, M. L., Kulcsar, K., Misra, V., Plowright, R., and Mossman, K. (2020).  
592 Novel Insights Into Immune Systems of Bats. *Front. Immunol.* 11, 26.
- 593 Banerjee, A., Kulcsar, K., Misra, V., Frieman, M., and Mossman, K. (2019). Bats and  
594 Coronaviruses. *Viruses* 11. doi:10.3390/v11010041.
- 595 Banerjee, A., Rapin, N., Bollinger, T., and Misra, V. (2017). Lack of inflammatory gene  
596 expression in bats: a unique role for a transcription repressor. *Sci. Rep.* 7, 2232.
- 597 Banyard, A. C., Hayman, D., Johnson, N., McElhinney, L., and Fooks, A. R. (2011). Bats and  
598 lyssaviruses. *Adv. Virus Res.* 79, 239–289.
- 599 Becker, D., Eby, P., Madden, W., Peel, A., and Plowright, R. (2021). Ecological conditions  
600 experienced by bat reservoir hosts predict the intensity of Hendra virus excretion over space  
601 and time. *bioRxiv*. Available at:  
602 <https://www.biorxiv.org/content/10.1101/2021.08.19.457011.abstract>.
- 603 Becker DJ, Albery GF, Kessler MK, Lunn TJ, Falvo CA, Czirják GÁ, Martin LB, Plowright RK.  
604 (2020a). Macroimmunology: The drivers and consequences of spatial patterns in wildlife  
605 immune defence. *Journal of Animal Ecology* 89:972–995. doi: 10.1111/1365-2656.13166
- 606 Becker, D. J., Albery, G. F., Sjodin, A. R., Poisot, T., Bergner, L. M., Chen, B., et al. (2022).  
607 Optimising predictive models to prioritise viral discovery in zoonotic reservoirs. *The Lancet  
608 Microbe*. doi:10.1016/S2666-5247(21)00245-7.
- 609 Becker, D. J., Broos, A., Bergner, L. M., Meza, D. K., Simmons, N. B., Fenton, M. B., et al.  
610 (2020b). Temporal patterns of vampire bat rabies and host connectivity in Belize.  
611 *Transbound. Emerg. Dis.* doi:10.1111/tbed.13754.
- 612 Becker, D. J., Czirják, G. Á., Rynda-Apple, A., and Plowright, R. K. (2019). Handling Stress and  
613 Sample Storage Are Associated with Weaker Complement-Mediated Bactericidal Ability in  
614 Birds but Not Bats. *Physiol. Biochem. Zool.* 92, 37–48.
- 615 Benjamini, Y., and Hochberg, Y. (1995). Controlling the false discovery rate: A practical and  
616 powerful approach to multiple testing. *J. R. Stat. Soc.* 57, 289–300.
- 617 Bergner, L. M., Mollentze, N., Orton, R. J., Tello, C., Broos, A., Biek, R., et al. (2021).  
618 Characterizing and Evaluating the Zoonotic Potential of Novel Viruses Discovered in  
619 Vampire Bats. *Viruses* 13. doi:10.3390/v13020252.
- 620 Bergner, L. M., Orton, R. J., and Streicker, D. G. (2020). Complete Genome Sequence of an  
621 Alphacoronavirus from Common Vampire Bats in Peru. *Microbiol Resour Announc* 9.

- 622 doi:10.1128/MRA.00742-20.
- 623 Bittar, C., Machado, R. R. G., Comelis, M. T., Bueno, L. M., Beguelini, M. R., Morielle-Versute,  
624 E., et al. (2020). Alphacoronavirus Detection in Lungs, Liver, and Intestines of Bats from  
625 Brazil. *Microb. Ecol.* 79, 203–212.
- 626 Bondet, V., Le Baut, M., Le Poder, S., Lecu, A., Petit, T., Wedlarski, R., et al. (2021).  
627 Constitutive IFN $\alpha$  protein production in bats. *bioRxiv*, 2021.06.21.449208.  
628 doi:10.1101/2021.06.21.449208.
- 629 Boni, M. F., Lemey, P., Jiang, X., Lam, T. T.-Y., Perry, B. W., Castoe, T. A., et al. (2020).  
630 Evolutionary origins of the SARS-CoV-2 sarbecovirus lineage responsible for the COVID-  
631 19 pandemic. *Nat Microbiol* 5, 1408–1417.
- 632 Brandão, P. E., Scheffer, K., Villarreal, L. Y., Achkar, S., Oliveira, R. de N., Fahl, W. de O., et  
633 al. (2008). A coronavirus detected in the vampire bat *Desmodus rotundus*. *Braz. J. Infect.*  
634 *Dis.* 12, 466–468.
- 635 Camacho, C., Coulouris, G., Avagyan, V., Ma, N., Papadopoulos, J., Bealer, K., et al. (2009).  
636 BLAST+: architecture and applications. *BMC Bioinformatics* 10, 421.
- 637 Corman, V. M., Rasche, A., Diallo, T. D., Cottontail, V. M., Stöcker, A., Souza, B. F. de C. D.,  
638 et al. (2013). Highly diversified coronaviruses in neotropical bats. *J. Gen. Virol.* 94, 1984–  
639 1994.
- 640 Davy, C. M., Donaldson, M. E., Subudhi, S., Rapin, N., Warnecke, L., Turner, J. M., et al.  
641 (2018). White-nose syndrome is associated with increased replication of a naturally  
642 persisting coronaviruses in bats. *Sci. Rep.* 8, 15508.
- 643 Demichev, V., Messner, C. B., Vernardis, S. I., Lilley, K. S., and Ralser, M. (2020). DIA-NN:  
644 neural networks and interference correction enable deep proteome coverage in high  
645 throughput. *Nat. Methods* 17, 41–44.
- 646 Dixon, P. (2003). VEGAN, a package of R functions for community ecology. *J. Veg. Sci.* 14,  
647 927–930.
- 648 Fischhoff, I. R., Castellanos, A. A., Rodrigues, J. P. G. L. M., Varsani, A., and Han, B. A.  
649 (2021). Predicting the zoonotic capacity of mammals to transmit SARS-CoV-2. *Proc. Biol.*  
650 *Sci.* 288, 20211651.
- 651 Geyer, P. E., Holdt, L. M., Teupser, D., and Mann, M. (2017). Revisiting biomarker discovery  
652 by plasma proteomics. *Mol. Syst. Biol.* 13, 942.
- 653 Guindon, S., Dufayard, J.-F., Lefort, V., Anisimova, M., Hordijk, W., and Gascuel, O. (2010).  
654 New algorithms and methods to estimate maximum-likelihood phylogenies: assessing the  
655 performance of PhyML 3.0. *Syst. Biol.* 59, 307–321.
- 656 Gunnell, G. F., and Simmons, N. B. (2012). *Evolutionary History of Bats: Fossils, Molecules*

- 657 *and Morphology*. Cambridge University Press.
- 658 Hall, J. S., Knowles, S., Nashold, S. W., Ip, H. S., Leon, A. E., Rocke, T., et al. (2021).  
659 Experimental challenge of a North American bat species, big brown bat (*Eptesicus fuscus*),  
660 with SARS-CoV-2. *Transbound. Emerg. Dis.* 68, 3443–3452.
- 661 Halpin, K., Hyatt, A. D., Fogarty, R., Middleton, D., Bingham, J., Epstein, J. H., et al. (2011).  
662 Pteropid bats are confirmed as the reservoir hosts of henipaviruses: a comprehensive  
663 experimental study of virus transmission. *Am. J. Trop. Med. Hyg.* 85, 946–951.
- 664 Hanley, J. A., and McNeil, B. J. (1982). The meaning and use of the area under a receiver  
665 operating characteristic (ROC) curve. *Radiology* 143, 29–36.
- 666 Heck, M., and Neely, B. A. (2020). Proteomics in Non-model Organisms: A New Analytical  
667 Frontier. *J. Proteome Res.* 19, 3595–3606.
- 668 Heinze, G., and Schemper, M. (2002). A solution to the problem of separation in logistic  
669 regression. *Stat. Med.* 21, 2409–2419.
- 670 Huang, Z., Gallot, A., Lao, N. T., Puechmaille, S. J., Foley, N. M., Jebb, D., et al. (2016). A  
671 nonlethal sampling method to obtain, generate and assemble whole blood transcriptomes  
672 from small, wild mammals. *Mol. Ecol. Resour.* 16, 150–162.
- 673 Huang, Z., Whelan, C. V., Foley, N. M., Jebb, D., Touzalin, F., Petit, E. J., et al. (2019).  
674 Longitudinal comparative transcriptomics reveals unique mechanisms underlying extended  
675 healthspan in bats. *Nat Ecol Evol* 3, 1110–1120.
- 676 Irving, A. T., Ahn, M., Goh, G., Anderson, D. E., and Wang, L.-F. (2021). Lessons from the host  
677 defences of bats, a unique viral reservoir. *Nature* 589, 363–370.
- 678 Jebb, D., Huang, Z., Pippel, M., Hughes, G. M., Lavrichenko, K., Devanna, P., et al. (2020). Six  
679 reference-quality genomes reveal evolution of bat adaptations. *Nature* 583, 578–584.
- 680 Kearse, M., Moir, R., Wilson, A., Stones-Havas, S., Cheung, M., Sturrock, S., et al. (2012).  
681 Geneious Basic: an integrated and extendable desktop software platform for the  
682 organization and analysis of sequence data. *Bioinformatics* 28, 1647–1649.
- 683 Kolberg, L., Raudvere, U., Kuzmin, I., Vilo, J., and Peterson, H. (2020). gprofiler2 -- an R  
684 package for gene list functional enrichment analysis and namespace conversion toolset  
685 g:Profiler. *F1000Res.* 9. doi:10.12688/f1000research.24956.2.
- 686 Kolde, R., and Kolde, M. R. (2015). Package “pheatmap.” *R package* 1, 790.
- 687 Lau, S. K. P., Wong, A. C. P., Luk, H. K. H., Li, K. S. M., Fung, J., He, Z., et al. (2020).  
688 Differential tropism of SARS-CoV and SARS-CoV-2 in bat cells. *Emerg. Infect. Dis.* 26,  
689 2961–2965.
- 690 Lazar, C., Gatto, L., Ferro, M., Bruley, C., and Burger, T. (2016). Accounting for the Multiple



- 691 Natures of Missing Values in Label-Free Quantitative Proteomics Data Sets to Compare  
692 Imputation Strategies. *J. Proteome Res.* 15, 1116–1125.
- 693 Lebreton, J. P., Joisel, F., Raoult, J. P., Lannuzel, B., Rogez, J. P., and Humbert, G. (1979).  
694 Serum concentration of human alpha 2 HS glycoprotein during the inflammatory process:  
695 evidence that alpha 2 HS glycoprotein is a negative acute-phase reactant. *J. Clin. Invest.* 64,  
696 1118–1129.
- 697 Li, W., Shi, Z., Yu, M., Ren, W., Smith, C., Epstein, J. H., et al. (2005). Bats are natural  
698 reservoirs of SARS-like coronaviruses. *Science* 310, 676–679.
- 699 Mallick, P., Schirle, M., Chen, S. S., Flory, M. R., Lee, H., Martin, D., et al. (2007).  
700 Computational prediction of proteotypic peptides for quantitative proteomics. *Nat.*  
701 *Biotechnol.* 25, 125–131.
- 702 Martins, F. M., Templeton, A. R., Pavan, A. C. O., Kohlbach, B. C., and Morgante, J. S. (2009).  
703 Phylogeography of the common vampire bat (*Desmodus rotundus*): marked population  
704 structure, Neotropical Pleistocene vicariance and incongruence between nuclear and  
705 mtDNA markers. *BMC Evol. Biol.* 9, 294.
- 706 Mollentze, N., and Streicker, D. G. (2020). Viral zoonotic risk is homogenous among taxonomic  
707 orders of mammalian and avian reservoir hosts. *Proc. Natl. Acad. Sci. U. S. A.* 117, 9423–  
708 9430.
- 709 Monchatre-Leroy, E., Boué, F., Boucher, J.-M., Renault, C., Moutou, F., Ar Gouilh, M., et al.  
710 (2017). Identification of Alpha and Beta Coronavirus in Wildlife Species in France: Bats,  
711 Rodents, Rabbits, and Hedgehogs. *Viruses* 9. doi:10.3390/v9120364.
- 712 Munster, V. J., Adney, D. R., van Doremalen, N., Brown, V. R., Miazgowiec, K. L., Milne-  
713 Price, S., et al. (2016). Replication and shedding of MERS-CoV in Jamaican fruit bats  
714 (*Artibeus jamaicensis*). *Sci. Rep.* 6, 21878.
- 715 Murtagh, F., and Legendre, P. (2014). Ward’s hierarchical agglomerative clustering method:  
716 Which algorithms implement ward’s criterion? *J. Classification* 31, 274–295.
- 717 Neely, B. A., Carlin, K. P., Arthur, J. M., McFee, W. E., and Janech, M. G. (2013). Ratiometric  
718 Measurements of Adiponectin by Mass Spectrometry in Bottlenose Dolphins (*Tursiops*  
719 *truncatus*) with Iron Overload Reveal an Association with Insulin Resistance and Glucagon.  
720 *Front. Endocrinol.* 4, 132.
- 721 Neely, B. A., Ferrante, J. A., Chaves, J. M., Soper, J. L., Almeida, J. S., Arthur, J. M., et al.  
722 (2014). Proteomic Analysis of Plasma from California Sea Lions (*Zalophus californianus*)  
723 Reveals Apolipoprotein E as a Candidate Biomarker of Chronic Domoic Acid Toxicosis.  
724 *PLoS One* 10, e0123295.
- 725 Neely, B. A., Janech, M. G., Brock Fenton, M., Simmons, N. B., Bland, A. M., and Becker, D. J.  
726 (2021). Surveying the vampire bat (*Desmodus rotundus*) serum proteome: a resource for  
727 identifying immunological proteins and detecting pathogens. *J. Proteome Res.* 20:2547–

- 728 2559.
- 729 Neely, B. A., Prager, K. C., Bland, A. M., Fontaine, C., Gulland, F. M., and Janech, M. G.  
730 (2018). Proteomic Analysis of Urine from California Sea Lions (*Zalophus californianus*): A  
731 Resource for Urinary Biomarker Discovery. *J. Proteome Res.* 17, 3281–3291.
- 732 Neely, B. A., Soper, J. L., Gulland, F. M. D., Bell, P. D., Kindy, M., Arthur, J. M., et al. (2015).  
733 Proteomic analysis of cerebrospinal fluid in California sea lions (*Zalophus californianus*)  
734 with domoic acid toxicosis identifies proteins associated with neurodegeneration.  
735 *Proteomics* 15, 4051–4063.
- 736 Olival, K. J., Hosseini, P. R., Zambrana-Torrel, C., Ross, N., Bogich, T. L., and Daszak, P.  
737 (2017). Host and viral traits predict zoonotic spillover from mammals. *Nature* 546, 646–  
738 650.
- 739 Papenfuss, A. T., Baker, M. L., Feng, Z.-P., Tachedjian, M., Cramer, G., Cowled, C., et al.  
740 (2012). The immune gene repertoire of an important viral reservoir, the Australian black  
741 flying fox. *BMC Genomics* 13, 261.
- 742 Pepe, M. S. (2003). *The Statistical Evaluation of Medical Tests for Classification and Prediction*.  
743 Oxford University Press.
- 744 Perez-Riverol, Y., Bai, J., Bandla, C., García-Seisdedos, D., Hewapathirana, S., Kamatchinathan,  
745 S., et al. (2022). The PRIDE database resources in 2022: a hub for mass spectrometry-based  
746 proteomics evidences. *Nucleic Acids Res.* 50, D543–D552.
- 747 Plowright, R. K., Becker, D. J., McCallum, H., and Manlove, K. R. (2019). Sampling to  
748 elucidate the dynamics of infections in reservoir hosts. *Philos. Trans. R. Soc. Lond. B Biol.*  
749 *Sci.* 374, 20180336.
- 750 Plowright, R. K., Peel, A. J., Streicker, D. G., Gilbert, A. T., McCallum, H., Wood, J., et al.  
751 (2016). Transmission or Within-Host Dynamics Driving Pulses of Zoonotic Viruses in  
752 Reservoir–Host Populations. *PLoS Negl. Trop. Dis.* 10, e0004796.
- 753 Raudvere, U., Kolberg, L., Kuzmin, I., Arak, T., Adler, P., Peterson, H., et al. (2019). g:Profiler:  
754 a web server for functional enrichment analysis and conversions of gene lists (2019 update).  
755 *Nucleic Acids Res.* 47, W191–W198.
- 756 Ren, L., Wu, C., Guo, L., Yao, J., Wang, C., Xiao, Y., et al. (2020). Single-cell transcriptional  
757 atlas of the Chinese horseshoe bat (*Rhinolophus sinicus*) provides insight into the cellular  
758 mechanisms which enable bats to be viral reservoirs. *bioRxiv*. Available at:  
759 <https://www.biorxiv.org/content/10.1101/2020.06.30.175778.abstract>.
- 760 Ritchie, M. E., Phipson, B., Wu, D., Hu, Y., Law, C. W., Shi, W., et al. (2015). limma powers  
761 differential expression analyses for RNA-sequencing and microarray studies. *Nucleic Acids*  
762 *Res.* 43, e47.
- 763 Rojas, D., Warsi, O. M., and Dávalos, L. M. (2016). Bats (Chiroptera: Noctilionoidea) Challenge

- 764 a Recent Origin of Extant Neotropical Diversity. *Syst. Biol.* 65, 432–448.
- 765 Ruiz-Aravena, M., McKee, C., Gamble, A., Lunn, T., Morris, A., Snedden, C. E., et al. (2021).  
766 Ecology, evolution and spillover of coronaviruses from bats. *Nat. Rev. Microbiol.*, 1–16.
- 767 Schneider, M. C., Romijn, P. C., Uieda, W., Tamayo, H., da Silva, D. F., Belotto, A., et al.  
768 (2009). Rabies transmitted by vampire bats to humans: an emerging zoonotic disease in  
769 Latin America? *Rev. Panam. Salud Publica* 25, 260–269.
- 770 Schulz, J. E., Seifert, S. N., Thompson, J. T., Avanzato, V., Sterling, S. L., Yan, L., et al. (2020).  
771 Serological Evidence for Henipa-like and Filo-like Viruses in Trinidad Bats. *J. Infect. Dis.*  
772 221, S375–S382.
- 773 Sikes, R. S., and Gannon, W. L. (2011). Guidelines of the American Society of Mammalogists  
774 for the use of wild mammals in research. *J. Mammal.* 92, 235–253.
- 775 Simmons, N. B., and Cirranello, A. L. (2019). Bat Species of the World: A taxonomic and  
776 geographic database. *Accessed on 11, 2019.*
- 777 Smith, C. S., de Jong, C. E., Meers, J., Henning, J., Wang, L.-F., and Field, H. E. (2016).  
778 Coronavirus Infection and Diversity in Bats in the Australasian Region. *Ecohealth* 13, 72–  
779 82.
- 780 Soudy, M., Anwar, A. M., Ahmed, E. A., Osama, A., Ezzeldin, S., Mahgoub, S., et al. (2020).  
781 UniprotR: Retrieving and visualizing protein sequence and functional information from  
782 Universal Protein Resource (UniProt knowledgebase). *J. Proteomics* 213, 103613.
- 783 Streicker, D. G., Winternitz, J. C., Satterfield, D. A., Condori-Condori, R. E., Broos, A., Tello,  
784 C., et al. (2016). Host-pathogen evolutionary signatures reveal dynamics and future  
785 invasions of vampire bat rabies. *Proc. Natl. Acad. Sci. U. S. A.* 113, 10926–10931.
- 786 Uhlén, M., Karlsson, M. J., Hober, A., Svensson, A.-S., Scheffel, J., Kotol, D., et al. (2019). The  
787 human secretome. *Sci. Signal.* 12. doi:10.1126/scisignal.aaz0274.
- 788 van Doremalen, N., Schäfer, A., Menachery, V. D., Letko, M., Bushmaker, T., Fischer, R. J., et  
789 al. (2018). SARS-Like Coronavirus WIV1-CoV Does Not Replicate in Egyptian Fruit Bats  
790 (*Rousettus aegyptiacus*). *Viruses* 10. doi:10.3390/v10120727.
- 791 Vlasova, A. N., Diaz, A., Damtie, D., Xiu, L., Toh, T.-H., Lee, J. S.-Y., et al. (2021). Novel  
792 Canine Coronavirus Isolated from a Hospitalized Pneumonia Patient, East Malaysia. *Clin.*  
793 *Infect. Dis.* doi:10.1093/cid/ciab456.
- 794 Walport, M. J. (2002). Complement and systemic lupus erythematosus. *Arthritis Res.* 4 Suppl 3,  
795 S279–93.
- 796 Wang, H., and Liu, M. (2021). Complement C4, Infections, and Autoimmune Diseases. *Front.*  
797 *Immunol.* 12, 694928.

- 798 Wang, L.-F., Gamage, A. M., Chan, W. O. Y., Hiller, M., and Teeling, E. C. (2021). Decoding  
799 bat immunity: the need for a coordinated research approach. *Nat. Rev. Immunol.* 21, 269–  
800 271.
- 801 Watanabe, S., Masangkay, J. S., Nagata, N., Morikawa, S., Mizutani, T., Fukushi, S., et al.  
802 (2010). Bat coronaviruses and experimental infection of bats, the Philippines. *Emerg. Infect.*  
803 *Dis.* 16, 1217–1223.
- 804 Wilkinson, G. S., and South, J. M. (2002). Life history, ecology and longevity in bats. *Aging Cell*  
805 1, 124–131.
- 806 Williamson, M. M., Hooper, P. T., Selleck, P. W., Westbury, H. A., and Slocombe, R. F. (2000).  
807 Experimental Hendra virus infection in pregnant guinea-pigs and fruit Bats (*Pteropus*  
808 *poliocephalus*). *J. Comp. Pathol.* 122, 201–207.
- 809 Woo, P. C. Y., Lau, S. K. P., Lam, C. S. F., Lau, C. C. Y., Tsang, A. K. L., Lau, J. H. N., et al.  
810 (2012). Discovery of seven novel Mammalian and avian coronaviruses in the genus  
811 deltacoronavirus supports bat coronaviruses as the gene source of alphacoronavirus and  
812 betacoronavirus and avian coronaviruses as the gene source of gammacoronavirus and  
813 deltacoronavirus. *J. Virol.* 86, 3995–4008.
- 814 Woo, P. C. Y., Lau, S. K. P., Li, K. S. M., Poon, R. W. S., Wong, B. H. L., Tsoi, H.-W., et al.  
815 (2006). Molecular diversity of coronaviruses in bats. *Virology* 351, 180–187.
- 816 Wray, A. K., Olival, K. J., Morán, D., Lopez, M. R., Alvarez, D., Navarrete-Macias, I., et al.  
817 (2016). Viral Diversity, Prey Preference, and *Bartonella* Prevalence in *Desmodus rotundus*  
818 in Guatemala. *Ecohealth* 13, 761–774.
- 819 Yang, B., Fan, J., Huang, J., Guo, E., Fu, Y., Liu, S., et al. (2021). Clinical and molecular  
820 characteristics of COVID-19 patients with persistent SARS-CoV-2 infection. *Nat. Commun.*  
821 12, 3501.
- 822 Yang, K., Li, J., and Gao, H. (2006). The impact of sample imbalance on identifying  
823 differentially expressed genes. *BMC Bioinformatics* 7 Suppl 4, S8.
- 824 Ye, Z.-W., Yuan, S., Yuen, K.-S., Fung, S.-Y., Chan, C.-P., and Jin, D.-Y. (2020). Zoonotic  
825 origins of human coronaviruses. *Int. J. Biol. Sci.* 16, 1686–1697.
- 826 Zechendorf, E., O’Riordan, C. E., Stiehler, L., Wischmeyer, N., Chiazza, F., Collotta, D., et al.  
827 (2020). Ribonuclease 1 attenuates septic cardiomyopathy and cardiac apoptosis in a murine  
828 model of polymicrobial sepsis. *JCI Insight* 5. doi:10.1172/jci.insight.131571.
- 829 Zhang, G., Cowled, C., Shi, Z., Huang, Z., Bishop-Lilly, K. A., Fang, X., et al. (2013).  
830 Comparative analysis of bat genomes provides insight into the evolution of flight and  
831 immunity. *Science* 339, 456–460.
- 832 Zhou, P., Tachedjian, M., Wynne, J. W., Boyd, V., Cui, J., Smith, I., et al. (2016). Contraction of  
833 the type I IFN locus and unusual constitutive expression of IFN- $\alpha$  in bats. *Proc. Natl. Acad.*

- 834           *Sci. U. S. A.* 113, 2696–2701.
- 835   Zhou, X., You, F., Chen, H., and Jiang, Z. (2012). Poly(C)-binding protein 1 (PCBP1) mediates  
836           housekeeping degradation of mitochondrial antiviral signaling (MAVS). *Cell Research* 22,  
837           717–727. doi:10.1038/cr.2011.184.
- 838   Zhu, X., Wang, Y., Zhang, H., Liu, X., Chen, T., Yang, R., et al. (2011). Genetic variation of the  
839           human  $\alpha$ -2-Heremans-Schmid glycoprotein (AHSG) gene associated with the risk of SARS-  
840           CoV infection. *PLoS One* 6, e23730.
- 841   Zinellu, A., and Mangoni, A. A. (2021). Serum Complement C3 and C4 and COVID-19 Severity  
842           and Mortality: A Systematic Review and Meta-Analysis With Meta-Regression. *Front.*  
843           *Immunol.* 12, 696085.
